# Supplementary material for: Detecting Applicant Faking With a Context-Specific Overclaiming Questionnaire
Source: Atypon-hosted journal article supplement (doi:10.1027/1614-0001/a000411), 2023-12-21
Supplement: 1614-0001_a000411_esm1.pdf [file 1614-0001_a000411_esm1.pdf]

### **Electronic Supplementary Material 1 for**

Diedenhofen, B., Hoffmann, A., Aust, F., & Müller, S. (2023). Detecting applicant faking with a context-specific overclaiming questionnaire. *Journal of Individual Differences*. <https://doi.org/10.1027/1614-0001/a000411>

## **Original material and results from additional analyses**

### **Detecting Applicant Faking With a Context-Specific Overclaiming Questionnaire**

This document includes original material in German language and additional analyses of the collected data that were outside the scope of the main manuscript but may be relevant to researchers in the field.

#### **Honest context instruction**

The instruction for the honest context read in the original German wording as follows:

Auf den folgenden Seiten werden wir Ihnen einige Fragen stellen. Bitte stellen Sie sich nun vor, dass Sie an einer **Selbsterfahrungsstudie** teilnehmen. Sie möchten unbedingt eine genaue und unverfälschte Rückmeldung zu Ihrer Persönlichkeit bekommen. Die folgenden Tests sind Teil dieser Selbsterfahrung. Ein ehrliches Antwortverhalten in diesen Tests ist eine Voraussetzung dafür, dass Ihre Selbsterfahrung erfolgreich verläuft. **Beantworten Sie die folgenden Fragen also möglichst ehrlich und authentisch, und verstellen Sie sich nicht.**

#### **Application context instruction**

The instruction for the application context read in the original German wording as follows:

Wir werden Ihnen nun die gleichen Tests von gerade noch einmal vorgeben. Bitte stellen Sie sich jedoch ab sofort vor, dass Sie **Psychologie studieren** und sich um ein **hochdotiertes und renommiertes Stipendium bewerben**. Sie möchten dieses Stipendium unbedingt bekommen. Die folgenden Tests sind Teil des Bewerbungsprozesses. Ein gutes Abschneiden in diesen Tests ist eine Voraussetzung dafür, dass Ihre Bewerbung erfolgreich verläuft. **Beantworten Sie die folgenden Fragen also so, dass Sie bestmögliche Chancen auf das Stipendium haben.**

**Manipulation check**

In the following, the manipulation check is shown in the original German wording.

Damit wir nachvollziehen können, dass Sie diese Anleitung gelesen und verstanden haben, markieren Sie bitte im Folgenden die korrekte Aussage:

- Ich soll mich bei der Beantwortung der Fragen auf den folgenden Seiten möglichst negativ darstellen.
- Ich soll auf die Fragen auf den folgenden Seiten so antworten, als wäre ich in einer Bewerbungssituation.
- Ich soll bei der Beantwortung der Fragen auf den folgenden Seiten einfach irgendetwas ankreuzen, ohne darüber nachzudenken.
- Ich soll auf die Fragen auf den folgenden Seiten so antworten, wie es auf mich persönlich derzeit zutrifft.

**Separate analysis for each faking tendencies item**

In the current study, the four items for measuring faking tendencies formed one scale. This approach seemed reasonable because the internal consistency of the items was high,  $\omega = .81$ , and the reliability of the scale should therefore exceed the reliability of a single item. Moreover, the measure of faking tendencies exhibited good fit to a unidimensional model in confirmatory factor analysis with maximum likelihood estimation according to established guidelines (Hu & Bentler, 1999),  $\chi^2 = 5.03$ ,  $p = .081$ ,  $CFI = .98$ ,  $RMSEA = .11$ ,  $SRMR = .03$ . In contrast, Feeney and Goffin (2015) analyzed the four faking tendencies items separately. For each item, they determined the correlation with OCQ bias and RICS, respectively. In addition to the analysis in the main manuscript, we conducted analyses for each of the four items separately, which we present in Tables S1-S5. To compare the correlations of OCQ bias and RICS with faking behavior, we used Hittner et al.'s (2003) test for the comparison of two dependent correlations that is implemented in the R package *cocor* (Diedenhofen & Musch, 2015). To compare the predictive value of OCQ bias and RICS in a multiple regression analysis with faking behavior as a criterion, we conducted Wald tests using the R package *car* (Fox & Weisberg, 2019).

**Table E1***Correlation of each faking tendencies item with OCQ bias and RICS*

| <b>Faking tendencies</b>                                                 | <b>OCQ Bias</b> | <b>RICS</b> | <b><i>z</i></b> | <b><i>p</i></b> |
|--------------------------------------------------------------------------|-----------------|-------------|-----------------|-----------------|
| (1) “I improved my answers in the application situation”                 | .46**           | .43**       | 0.32            | .748            |
| (2) “In the application situation, I slightly understated my weaknesses” | .36**           | .36**       | -0.05           | .960            |
| (3) “In the application situation, I slightly exaggerated my strengths”  | .38**           | .40**       | -0.24           | .807            |
| (4) “I completely misrepresented myself in the application situation.”   | .49**           | .23*        | 2.78            | .006            |

*Note.* \*  $p < .05$ , \*\*  $p < .001$ . The columns  $z$  and  $p$  report the outcome of a two-tailed test for the comparison of the dependent correlations in the columns OCQ Bias and RICS (Hittner et al., 2003).

**Table E2**

*Multiple Regression Analysis With OCQ Bias and RICS as Predictors and Faking Behavior Operationalized Using Only the First Faking Tendencies Item as Criterion*

| <b>Effect</b> | <b><i>b</i> (SE)</b> | <b><math>\beta</math></b> | <b><i>p</i></b> |
|---------------|----------------------|---------------------------|-----------------|
| Intercept     | 5.74 (0.12)          |                           | < .001          |
| OCQ bias      | 0.51 (0.12)          | .36                       | < .001          |
| RICS          | 0.68 (0.18)          | .31                       | < .001          |

*Note.* Adjusted  $R^2 = .29$ . The predictive value of OCQ bias and RICS did not differ significantly,  $F(1, 120) = 0.11$ ,  $p = .742$ .

**Table E3**

*Multiple Regression Analysis With OCQ Bias and RICS as Predictors and Faking Behavior Operationalized Using Only the Second Faking Tendencies Item as Criterion*

| <b>Effect</b> | <b><i>b</i> (SE)</b> | <b><math>\beta</math></b> | <b><i>p</i></b> |
|---------------|----------------------|---------------------------|-----------------|
| Intercept     | 4.91 (0.16)          |                           | < .001          |
| OCQ bias      | 0.46 (0.15)          | .27                       | < .001          |
| RICS          | 0.71 (0.23)          | .27                       | < .001          |

*Note.* Adjusted  $R^2 = .18$ . The predictive value of OCQ bias and RICS did not differ significantly,  $F(1, 120) = 0.00$ ,  $p = .959$ .

**Table E4**

*Multiple Regression Analysis With OCQ Bias and RICS as Predictors and Faking Behavior Operationalized Using Only the Third Faking Tendencies Item as Criterion*

| <b>Effect</b> | <b><i>b</i> (SE)</b> | <b><math>\beta</math></b> | <b><i>p</i></b> |
|---------------|----------------------|---------------------------|-----------------|
| Intercept     | 5.48 (0.14)          |                           | < .001          |
| OCQ bias      | 0.44 (0.13)          | .28                       | < .001          |
| RICS          | 0.75 (0.20)          | .31                       | < .001          |

*Note.* Adjusted  $R^2 = .22$ . The predictive value of OCQ bias and RICS did not differ significantly,  $F(1, 120) = 0.06$ ,  $p = .805$ .

**Table E5**

*Multiple Regression Analysis With OCQ Bias and RICS as Predictors and Faking Behavior Operationalized Using Only the Fourth Faking Tendencies Item as Criterion*

| Effect    | <i>b</i> (SE) | $\beta$ | <i>p</i> |
|-----------|---------------|---------|----------|
| Intercept | 3.58 (0.17)   |         | < .001   |
| OCQ bias  | 0.91 (0.16)   | .47     | < .001   |
| RICS      | 0.21 (0.25)   | .72     | < .001   |

*Note.* Adjusted  $R^2 = .23$ . The predictive value of OCQ bias and RICS differed significantly,  $F(1, 120) = 8.32, p = .005$ .

### References

- Diedenhofen, B., & Musch, J. (2015). cocor: A Comprehensive Solution for the Statistical Comparison of Correlations. *PLOS ONE*, *10*(4), e0121945.  
<https://doi.org/10.1371/journal.pone.0121945>
- Feeney, J. R., & Goffin, R. D. (2015). The Overclaiming Questionnaire: A good way to measure faking? *Personality and Individual Differences*, *82*, 248–252.  
<https://doi.org/10.1016/j.paid.2015.03.038>
- Fox, J., & Weisberg, S. (2019). *An R Companion to Applied Regression* (3rd ed.). Sage.
- Hittner, J. B., May, K., & Silver, N. C. (2003). A Monte Carlo evaluation of tests for comparing dependent correlations. *The Journal of General Psychology*, *130*(2), 149–168. <https://doi.org/10.1080/00221300309601282>
- Hu, L., & Bentler, P. M. (1999). Cutoff criteria for fit indexes in covariance structure analysis: Conventional criteria versus new alternatives. *Structural Equation Modeling: A Multidisciplinary Journal*, *6*(1), 1–55.  
<https://doi.org/10.1080/10705519909540118>
